# Supplementary material
Source: publisher site journal article supplement (https://www.dovepress.com/get_supplementary_file.php?f=328512.docx)
Supplement: Supplementary file 1 [file get_supplementary_file.php]

**Supplementary material. Suggested future research use of KidDiCo.**

| Future use of the Kidney Disease Cohort | |
| --- | --- |
| Type of study | Suggested topic |
| Prevalence studies | Chronic and acute kidney disease |
| Risk factor studies | Study of risk factors for renal disease or cardiovascular disease |
| Longitudinal/prospective | Progression of kidney disease over time and its risk factors |
| Cut-off studies | Troponin cut-offs for acute myocardial infarction |
| Risk stratification models | Troponin in risk stratification models |
